# Supplementary material
Source: PubMed Central journal article supplement (PMC3740329)
Supplement: NIHMS486375-supplement-Supplementary_Tables.pdf [file NIHMS486375-supplement-Supplementary_Tables.pdf]

## Supplemental Tables

**Table S1. The Genomic Position of the Cloned Common Fragile Sites and the Percent of LOH from the Informative SNPs in These Sites in Keratinocytes Expressing E6/E7 for 250 Days, Related to Figure 1**

| Name   | Genomic position          | First DNA marker         | Last DNA marker        | % LOH |
|--------|---------------------------|--------------------------|------------------------|-------|
| FRA1E  | chr1:97590551-97775984    | RP11-359C24              | RP11-359C24            | 14    |
| FRA1H  | chr1:215747462-224071249  | RP11-157G15              | RP11-145A3 (AC099066)  | 17    |
| FRA2G  | chr2:169206756-170180166  | RP11-285F23 (AC009475.5) | 724o16 (AC093899)      | 0     |
| FRA3B  | chr3:59594241-64182258    | D3S3577 (AFMA210ZA9)     | D3S1287 (AFM198TE7)    | 21    |
| FRA4F  | chr4:89423578-97531947    | RH94252                  | D4S2407                | 19    |
| FRA6E  | chr6:160500260-163733950  | RH92608                  | RH63999                | 12    |
| FRA6F  | chr6:106914430-112526158  | SHGC-140029              | D6S1259                | 14    |
| FRA6H  | chr6:27444496-35124983    | RP1-153G14               | RP11-174N3             | 15    |
| FRA7E  | chr7:80076100-84773885    | swss4015                 | SHGC-104456            | 28    |
| FRA7G  | chr7:110002495-116223632  | RH122988                 | D7S2460                | 17    |
| FRA7H  | chr7:129561870-130586320  | A006N09                  | D7S2531                | 22    |
| FRA7I  | chr7:144515774-145723576  | D7S1477                  | D7S739                 | 27    |
| FRA8C  | chr8:124267550-128310523  | D8S1160                  | SHGC-130454            | 13    |
| FRA9E  | chr9:108363908-118078904  | SHGC-106699              | RH62868                | 13    |
| FRA9G  | chr9:17136369-17438541    | RP11-340N12              | RP11-492A12            | 50    |
| FRA11E | chr11:32043691-33948551   | D11S1301                 | D11S4965               | 31    |
| FRA11F | chr11:83931850-91370034   | rp11-613j18              | RP11-841F15            | 19    |
| FRA11G | chr11:113877495-116515577 | RP11-172C16 (AC020549.4) | RP11-823O21 (AP000936) | 10    |
| FRA13E | chr13:72407018-74670617   | RP11-505F3 (AL354720)    | RP11-132L12            | 18    |
| FRA16D | chr16:76161223-77681818   | D16S3138                 | WI-2755                | 17    |

**Table S2. Main Copy Number Variations in Keratinocytes Expressing E6/E7 for 250 Days, Related to Figure 1**

| <b>Copy Number State</b> | <b>Loss/Gain</b> | <b>Chr Cytoband</b> |
|--------------------------|------------------|---------------------|
| 1                        | Loss             | 1p36.31-p36.33      |
| 3                        | Gain             | 4p15.33-p16.3       |
| 3                        | Gain             | 7p11.1-p22.3        |
| 1                        | Loss             | 8p23.3-11.21        |
| 3                        | Gain             | 8q11.1-q24.3        |
| 1                        | Loss             | 10q11.21-q11.22     |
| 3                        | Gain             | 11p15.5-q25         |
| 3                        | Gain             | 20p13-q13.33        |
| 1                        | Loss             | Xq28                |
| 1                        | Loss             | 2q11.2              |
| 1                        | Loss             | 2q13                |
| 1                        | Loss             | 2q21.1              |
| 1                        | Loss             | 4q35.2              |
| 1                        | Loss             | 12q13.12            |
| 3                        | Gain             | 12q24.33            |
| 3                        | Gain             | 19q13.33            |
| 1                        | Loss             | 21q11.2             |
| 3                        | Gain             | Xp11.4              |
| 1                        | Loss             | Xq13.3              |
| 3                        | Gain             | Xq22.3              |

**Table S3. Related to Figures 2, 3, and 4**

**A. Deoxynucleotide Levels in Keratinocyte Cells, nmol/10<sup>6</sup> cells, n.d – not detectable**

|              | <b>dATP</b>   | <b>TTP</b>    | <b>dCTP</b>   | <b>dGTP</b>    |
|--------------|---------------|---------------|---------------|----------------|
| Primary      | 0.0089±0.0025 | 0.0147±0.0052 | 0.0039±0.0015 | 0.0015±0.00092 |
| E6/E7        | 0.0022±0.0005 | 0.0061±0.0018 | 0.0008±0.0002 | 0.0008±0.0005  |
| E6/E7 + AUCG | 0.0077±0.0004 | 0.0433±0.0165 | 0.0024±0.0006 | 0.0007±0.0001  |
| E6/E7+myc    | 0.0079±0.0019 | 0.0180±0.0022 | 0.0027±0.0006 | 0.0006±0.0001  |

**B. Ribonucleotide Levels in Keratinocyte Cells, nmol/10<sup>6</sup> cells, n.d – not detectable**

|              | <b>ATP</b> | <b>UTP</b> | <b>CTP</b> | <b>GTP</b> |
|--------------|------------|------------|------------|------------|
| Primary      | 8.31±1.48  | 0.74±0.24  | 0.21±0.08  | 1.12±0.23  |
| E6/E7        | 4.46±0.58  | 0.35±0.06  | 0.07±0.1   | 0.62±0.07  |
| E6/E7 + AUCG | 5.02±0.75  | 0.81±0.18  | 0.16±0.03  | 0.63±0.11  |
| E6/E7+Myc    | 6.49±0.82  | 0.66±0.08  | 0.12±0.01  | 0.85±0.08  |

**C. Deoxynucleotide Levels in BJ Cells, nmol/10<sup>6</sup> cells, n.d – not detectable**

|               | <b>dATP</b> | <b>TTP</b> | <b>dCTP</b> | <b>dGTP</b> |
|---------------|-------------|------------|-------------|-------------|
| BJ vector     | 0.041587    | 0.050818   | 0.006174    | n.d         |
| BJ cycE       | 0.004482    | 0.033579   | n.d         | n.d         |
| BJ cycE c-myc | 0.044793    | 0.326669   | 0.044927    | 0.007817    |

**D. Ribonucleotide Levels in BJ Cells, nmol/10<sup>6</sup> cells, n.d – not detectable**

|                  | <b>ATP</b> | <b>UTP</b> | <b>CTP</b> | <b>GTP</b> |
|------------------|------------|------------|------------|------------|
| BJ vector        | 2.49±0.25  | 0.67±0.05  | 0.17±0.01  | 0.43±0.04  |
| BJ cyclin E      | 1.17±0.26  | 0.33±0.08  | 0.10±0.02  | 0.22±0.05  |
| BJ cyclinE c-myc | 4.89±0.53  | 1.68±0.12  | 0.43±0.29  | 1.00±0.07  |

**E. Ribonucleotide Levels in Fibroblast Cells, nmol/10<sup>6</sup> cells, n.d – not detectable**

|                | <b>ATP</b> | <b>UTP</b> | <b>CTP</b> | <b>GTP</b> |
|----------------|------------|------------|------------|------------|
| Fib vector     | 9.361509   | 2.497809   | 0.46418    | 1.627877   |
| Fib cycE       | 6.563529   | 1.686674   | 0.328147   | 1.106152   |
| Fib cycE c-myc | 9.768116   | 3.048007   | 0.658514   | 1.629529   |
